# Supplementary material for: Using Micro- and Macro-Level Network Metrics Unveils Top Communicative Gene Modules in Psoriasis
Source: MDPI journal article supplement (doi:10.3390/genes11080914), 2020-08-10
Supplement: s1 [file s1]

**Table S2.** Top 50 upregulated DEGs among lesional and non-lesional samples.

| <b>prob_id</b> | <b>Gene symbol</b> | <b>logFC</b> | <b>P.Value</b> | <b>adj.P.Val</b> |
|----------------|--------------------|--------------|----------------|------------------|
| 220528_at      | VNN3               | 7.21         | 1.04E-63       | 5.68E-60         |
| 211906_s_at    | SERPINB4           | 6.51         | 2.70E-59       | 6.43E-56         |
| 205863_at      | S100A12            | 6.39         | 6.49E-61       | 1.87E-57         |
| 232220_at      | S100A7A            | 5.79         | 4.15E-67       | 3.78E-63         |
| 220655_at      | TNIP3              | 5.53         | 6.57E-52       | 6.31E-49         |
| 205513_at      | TCN1               | 5.15         | 3.29E-63       | 1.50E-59         |
| 207602_at      | TMPRSS11D          | 5.06         | 9.80E-61       | 2.55E-57         |
| 220664_at      | SPRR2C             | 4.89         | 5.54E-61       | 1.68E-57         |
| 238689_at      | ADGRF1             | 4.75         | 7.00E-48       | 3.33E-45         |
| 204470_at      | CXCL1              | 4.66         | 2.25E-42       | 5.89E-40         |
| 1569555_at     | GDA                | 4.47         | 6.22E-57       | 1.17E-53         |
| 207367_at      | ATP12A             | 4.39         | 1.85E-43       | 5.63E-41         |
| 202859_x_at    | CXCL8              | 4.21         | 2.42E-41       | 5.51E-39         |
| 206561_s_at    | AKR1B10            | 4.15         | 3.12E-63       | 1.50E-59         |
| 204385_at      | KYNU               | 4.05         | 3.35E-69       | 9.15E-65         |
| 218990_s_at    | SPRR3              | 4.05         | 1.91E-35       | 2.17E-33         |
| 220810_at      | CLCA3P             | 3.98         | 8.19E-31       | 5.53E-29         |
| 232170_at      | S100A7A            | 3.98         | 9.35E-51       | 6.91E-48         |
| 1553434_at     | CYP4Z2P            | 3.94         | 1.67E-39       | 3.13E-37         |
| 219554_at      | RHCG               | 3.92         | 5.65E-64       | 3.43E-60         |
| 203535_at      | S100A9             | 3.92         | 4.55E-53       | 5.08E-50         |
| 209719_x_at    | SERPINB3           | 3.91         | 1.37E-62       | 5.00E-59         |
| 205242_at      | CXCL13             | 3.91         | 1.33E-43       | 4.14E-41         |
| 232074_at      | PRSS27             | 3.91         | 7.03E-61       | 1.92E-57         |
| 216876_s_at    | IL17A              | 3.90         | 2.02E-39       | 3.74E-37         |
| 217315_s_at    | KLK13              | 3.87         | 5.14E-52       | 5.11E-49         |
| 221404_at      | IL36A              | 3.86         | 1.25E-34       | 1.30E-32         |
| 205660_at      | OASL               | 3.85         | 2.30E-67       | 2.51E-63         |
| 205476_at      | CCL20              | 3.84         | 1.29E-37       | 1.92E-35         |
| 219403_s_at    | HPSE               | 3.81         | 1.26E-64       | 8.63E-61         |
| 204475_at      | MMP1               | 3.78         | 1.25E-25       | 4.63E-24         |
| 220249_at      | HYAL4              | 3.78         | 8.92E-40       | 1.72E-37         |
| 239430_at      | IGFL1              | 3.71         | 3.05E-49       | 1.75E-46         |
| 212531_at      | LCN2               | 3.58         | 4.18E-50       | 2.72E-47         |
| 1554914_at     | PLA2G4D            | 3.54         | 3.35E-68       | 4.58E-64         |
| 220322_at      | IL36G              | 3.53         | 3.86E-63       | 1.62E-59         |
| 207901_at      | IL12B              | 3.43         | 1.77E-33       | 1.62E-31         |
| 206367_at      | REN                | 3.40         | 3.96E-43       | 1.14E-40         |
| 217110_s_at    | MUC4               | 3.39         | 1.70E-26       | 6.97E-25         |
| 231033_at      | DSC2               | 3.35         | 3.19E-39       | 5.82E-37         |

|              |           |      |          |          |
|--------------|-----------|------|----------|----------|
| 223869_at    | SOST      | 3.34 | 3.52E-28 | 1.75E-26 |
| 204733_at    | KLK6      | 3.33 | 8.40E-34 | 7.93E-32 |
| 227735_s_at  | C10orf99  | 3.31 | 2.09E-45 | 7.52E-43 |
| 1558549_s_at | VNN1      | 3.28 | 7.86E-52 | 7.41E-49 |
| 219270_at    | CHAC1     | 3.26 | 1.78E-39 | 3.31E-37 |
| 216258_s_at  | SERPINB13 | 3.21 | 1.65E-48 | 8.57E-46 |
| 220745_at    | IL19      | 3.14 | 1.61E-40 | 3.38E-38 |
| 234408_at    | IL17F     | 3.14 | 7.62E-31 | 5.16E-29 |
| 224071_at    | IL20      | 3.14 | 8.91E-31 | 5.99E-29 |
| 223906_s_at  | TEX101    | 3.13 | 6.33E-41 | 1.40E-38 |
| 210164_at    | GZMB      | 3.13 | 5.33E-50 | 3.31E-47 |

---
