# Supplementary material for: Using Micro- and Macro-Level Network Metrics Unveils Top Communicative Gene Modules in Psoriasis
Source: MDPI journal article supplement (doi:10.3390/genes11080914), 2020-08-10
Supplement: s1 [file s1]

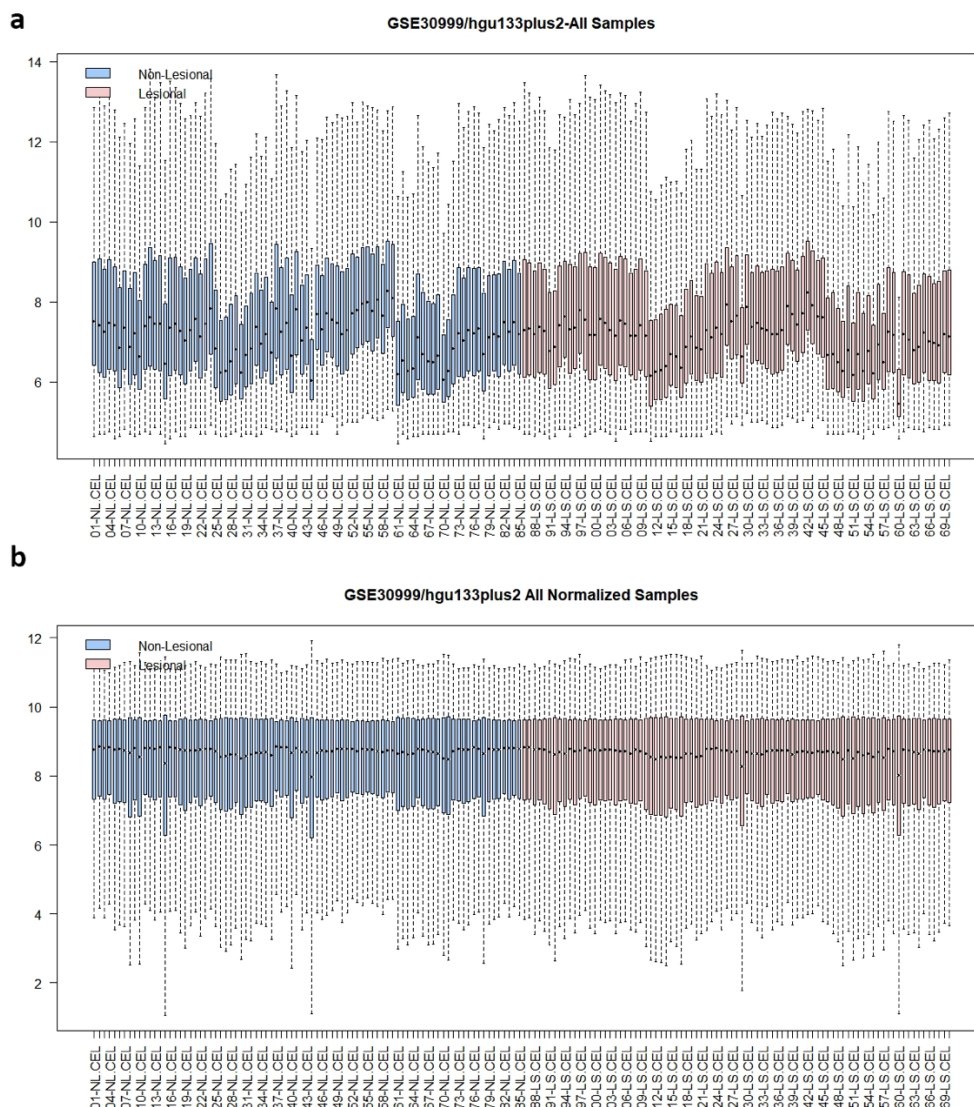

**Figure S2.** Boxplots of raw data for the expression level values transformed to log base 2. (a) And (b) demonstrate pre-normalized and normalized samples, respectively.
