# Supplementary material for: Using Micro- and Macro-Level Network Metrics Unveils Top Communicative Gene Modules in Psoriasis
Source: MDPI journal article supplement (doi:10.3390/genes11080914), 2020-08-10
Supplement: s1 [file s1]

**Table S13.** Intersectional pathways among top 20 enriched pathways based on 149 merged genes from modules 1 and 2 sorted by combined score by WikiPathways 2019 HUMAN Database

| Index | Term                                                               | Genes                                                                   | Combined<br>score |
|-------|--------------------------------------------------------------------|-------------------------------------------------------------------------|-------------------|
| 1     | IL-4 Signaling Pathway WP395                                       | SOCS3;STAT1;STAT3;BIRC5;PIK3R1;CBL;<br>MAPK14                           | 273.8             |
| 2     | Integrated Cancer Pathway<br>WP1971                                | BLM;STAT1;CHEK1;PLK1;CDK1;CDC25A                                        | 255.5             |
| 3     | Hepatitis C and Hepatocellular<br>Carcinoma WP3646                 | CXCL8;RRM2;NOS2;STAT3;BIRC5;<br>MAPK14                                  | 218.7             |
| 4     | Photodynamic therapy-induced<br>AP-1 survival signaling.<br>WP3611 | CCNA2;PDGFRA;IFNG;MAPK14;MCL1;<br>MAPK13                                | 212.4             |
| 5     | Regulation of toll-like receptor<br>signaling pathway WP1449       | CXCL10;CXCL11;CXCL9;CXCL8;STAT1;<br>IL1B;PLK1;IRF7;PIK3R1;MAPK14;MAPK13 | 198.7             |
