# Supplementary material for: Using Micro- and Macro-Level Network Metrics Unveils Top Communicative Gene Modules in Psoriasis
Source: MDPI journal article supplement (doi:10.3390/genes11080914), 2020-08-10
Supplement: s1 [file s1]

**Table S11.** Top enriched pathways in module 2 ranked in order of combined score by KEGG 2019 HUMAN Database.

| Index | Name                                        | Genes                                                                                                 | Combined score |
|-------|---------------------------------------------|-------------------------------------------------------------------------------------------------------|----------------|
| 1     | Influenza A                                 | CXCL8;DDX58;PRKCB;STAT1;PIK3R1;MAPK14;<br>MAPK13;IFIH1;SOCS3;CXCL10;IFNG;OAS1;OAS2<br>;IL1B;OAS3;IRF7 | 1298.5         |
| 2     | Pertussis                                   | CXCL8;CALML5;NOS2;IL23A;IL1B;IRF1;CALML3<br>;MAPK14;MAPK13                                            | 1012.0         |
| 3     | Hepatitis C                                 | DDX58;EGF;STAT1;STAT3;PIK3R1;SOCS3;<br>CXCL10;IFNG;OAS1;OAS2;OAS3;IRF7;PPARA                          | 906.5          |
| 4     | RIG-I-like receptor<br>signaling pathway    | IFIH1;CXCL10;CXCL8;DDX58;IRF7;ISG15;<br>MAPK14;MAPK13                                                 | 860.8          |
| 5     | Toll-like receptor<br>signaling pathway     | CXCL10;CXCL9;CXCL11;CXCL8;STAT1;IL1B;<br>IRF7;PIK3R1;MAPK14;MAPK13                                    | 845.2          |
| 6     | C-type lectin receptor<br>signaling pathway | CALML5;IL23A;STAT1;IL1B;IRF1;CALML3;<br>PIK3R1;MAPK14;MAPK13                                          | 660.1          |
| 7     | Salmonella infection                        | TJP1;CXCL8;IFNG;NOS2;IL1B;MYH14;MAPK14;<br>MAPK13                                                     | 650.9          |
| 8     | Prolactin signaling<br>pathway              | SOCS3;STAT1;IRF1;STAT3;PIK3R1;MAPK14;<br>MAPK13                                                       | 632.2          |
| 9     | Prolactin signaling<br>pathway              | SOCS3;STAT1;IRF1;STAT3;PIK3R1;MAPK14;<br>MAPK13                                                       | 632.2          |
| 10    | Epstein-Barr virus<br>infection             | LYN;DDX58;STAT1;STAT3;ISG15;PIK3R1;<br>MAPK14;MAPK13;CXCL10;OAS1;OAS2;OAS3;<br>IRF7                   | 629.4          |
