# Supplementary material for: Using Micro- and Macro-Level Network Metrics Unveils Top Communicative Gene Modules in Psoriasis
Source: MDPI journal article supplement (doi:10.3390/genes11080914), 2020-08-10
Supplement: s1 [file s1]

**Table S12.** Intersectional pathways among top 20 enriched pathways based on 149 merged genes from modules 1 and 2 sorted by combined score by KEGG 2019 HUMAN Database

| Index | Term                                    | Genes                                                                                                  | Combined score |
|-------|-----------------------------------------|--------------------------------------------------------------------------------------------------------|----------------|
| 1     | Progesterone-mediated oocyte maturation | PLK1;PIK3R1;CDC25C;MAPK14;CDC25A; AURKA;MAPK13;CCNA2;CCNB2;CCNB1; CDK1;BUB1;MAD2L1                     | 500.8          |
| 2     | Influenza A                             | CXCL8;PRKCB;DDX58;STAT1;PIK3R1; MAPK14;MAPK13;IFIH1;SOCS3;CXCL10; IFNG; OAS1;OAS2;IL1B;OAS3;IRF7;KPNA2 | 428.6          |
| 3     | Oocyte meiosis                          | CDC20;CCNB2;CCNB1;CALML5;PTTG1;PLK1 ;CDK1;CALML3;CDC25C;BUB1;AURKA; MAD2L1                             | 290.6          |
| 4     | Cellular senescence                     | CXCL8;CALML5;CALML3;PIK3R1;FOXN1; MAPK14;CDC25A;MAPK13;CCNA2;CCNB2; CCNB1;CHEK1;CDK1                   | 242.5          |
| 5     | Epstein-Barr virus infection            | LYN;DDX58;STAT1;STAT3;ISG15;PIK3R1; MAPK14;MAPK13;CCNA2;CXCL10;OAS1; OAS2;OAS3;IRF7                    | 203.9          |
| 6     | Hepatitis B                             | IFIH1;CCNA2;CXCL8;PRKCB;DDX58;STAT1; STAT3;IRF7;BIRC5;PIK3R1;MAPK14; MAPK13                            | 192.5          |
| 7     | FoxO signaling pathway                  | CCNB2;CCNB1;EGF;PLK1;CAT;STAT3; PIK3R1;MAPK14;MAPK13                                                   | 130.4          |
