# Supplementary material for: Using Micro- and Macro-Level Network Metrics Unveils Top Communicative Gene Modules in Psoriasis
Source: MDPI journal article supplement (doi:10.3390/genes11080914), 2020-08-10
Supplement: s1 [file s1]

**Table S10.** Top 10 enriched pathways in module 2 in order of combined score by Wikipathways 2019 HUMAN database.

| Index | Term                                                   | Genes                                                          | Combined score |
|-------|--------------------------------------------------------|----------------------------------------------------------------|----------------|
| 1     | Type II interferon signaling (IFNG) WP619              | SOCS3;CXCL10;CXCL9;NOS2;OAS1;IFNG;STAT1;IL1B;IRF1;ISG15        | 3324.9         |
| 2     | RIG-I-like Receptor Signaling WP3865                   | IFIH1;CXCL10;CXCL8;IFNG;DDX58;IRF7;ISG15;MAPK14;MAPK13         | 1388.0         |
| 3     | IL-10 Anti-inflammatory Signaling Pathway WP4495       | STAT1;STAT3;HMOX1                                              | 948.8          |
| 4     | Toll-like receptor signaling pathway                   | CXCL10;CXCL11;CXCL9;CXCL8;STAT1;IL1B;IRF7;PIK3R1;MAPK14;MAPK13 | 860.1          |
| 5     | Non-genomic actions of 1,25 dihydroxyvitamin D3 WP4341 | CXCL8;IFNG;PRKCB;OAS2;STAT1;ISG15;MAPK14;MAPK13                | 844.5          |
| 6     | Kit receptor signaling pathway WP304                   | SOCS3;IRS1;LEP;STAT3                                           | 796.4          |
| 7     | Leptin signaling pathway WP2034                        | SOCS3;STAT1;IL1B;LEP;STAT3;PIK3R1;MAPK14;ACACB                 | 770.3          |
| 8     | Prolactin Signaling Pathway WP2037                     | SOCS3;NOS2;STAT1;IRF1;STAT3;PIK3R1;CBL;MAPK14                  | 770.3          |
| 9     | IL-4 Signaling Pathway WP395                           | SOCS3;IRS1;STAT1;STAT3;PIK3R1;CBL;MAPK14                       | 629.8          |
| 10    | Interferon type I signaling pathways WP585             | SOCS3;STAT1;STAT3;PIK3R1;CBL;MAPK14                            | 629.8          |
