# Supplementary material for: Using Micro- and Macro-Level Network Metrics Unveils Top Communicative Gene Modules in Psoriasis
Source: MDPI journal article supplement (doi:10.3390/genes11080914), 2020-08-10
Supplement: s1 [file s1]

**Table S3.** Top 50 downregulated DEGs among lesional and non-lesional samples

| <b>prob_id</b> | <b>Gene symbol</b> | <b>logFC</b> | <b>P.Value</b> | <b>adj.P.Val</b> |
|----------------|--------------------|--------------|----------------|------------------|
| 228241_at      | AGR3               | -4.05        | 1.66E-27       | 7.63E-26         |
| 207326_at      | BTC                | -3.62        | 1.86E-36       | 2.41E-34         |
| 217059_at      | MUC7               | -3.36        | 2.11E-27       | 9.56E-26         |
| 229477_at      | THRSP              | -3.34        | 6.61E-18       | 9.61E-17         |
| 204712_at      | WIF1               | -3.18        | 8.52E-29       | 4.54E-27         |
| 206143_at      | SLC26A3            | -3.12        | 5.29E-14       | 4.80E-13         |
| 220196_at      | MUC16              | -3.11        | 4.96E-21       | 1.05E-19         |
| 204515_at      | HSD3B1             | -2.96        | 2.02E-12       | 1.50E-11         |
| 1553211_at     | ANKFN1             | -2.88        | 1.29E-19       | 2.30E-18         |
| 214240_at      | GAL                | -2.85        | 7.09E-12       | 4.92E-11         |
| 205813_s_at    | MAT1A              | -2.73        | 1.60E-25       | 5.84E-24         |
| 205843_x_at    | CRAT               | -2.73        | 2.02E-22       | 5.07E-21         |
| 215682_at      | LOC440792          | -2.72        | 9.52E-25       | 3.14E-23         |
| 237748_at      | SCGB2B2            | -2.68        | 4.42E-19       | 7.36E-18         |
| 208331_at      | BPY2               | -2.66        | 5.91E-07       | 2.19E-06         |
| 239929_at      | PM20D1             | -2.66        | 1.22E-09       | 6.42E-09         |
| 228403_at      | ENHO               | -2.62        | 1.61E-23       | 4.57E-22         |
| 216881_x_at    | PRB4               | -2.59        | 6.46E-31       | 4.42E-29         |
| 237076_at      | NCSTN              | -2.54        | 6.38E-29       | 3.47E-27         |
| 202218_s_at    | FADS2              | -2.50        | 2.05E-11       | 1.34E-10         |
| 219619_at      | DIRAS2             | -2.49        | 1.10E-23       | 3.18E-22         |
| 206393_at      | TNNI2              | -2.49        | 4.29E-22       | 1.04E-20         |
| 206794_at      | ERBB4              | -2.48        | 1.11E-23       | 3.21E-22         |
| 1557598_at     | LOC101927870       | -2.45        | 8.38E-18       | 1.20E-16         |
| 205979_at      | SCGB2A1            | -2.44        | 1.83E-23       | 5.17E-22         |
| 1560011_at     | JRK                | -2.42        | 2.64E-27       | 1.18E-25         |
| 205404_at      | HSD11B1            | -2.42        | 3.10E-26       | 1.23E-24         |
| 230045_at      | CNTN2              | -2.41        | 1.41E-29       | 8.22E-28         |

|              |                 |       |          |          |
|--------------|-----------------|-------|----------|----------|
| 205856_at    | SLC14A1         | -2.41 | 2.70E-29 | 1.52E-27 |
| 234513_at    | ELOVL3          | -2.41 | 5.76E-11 | 3.57E-10 |
| 231963_at    | ANKRD33B        | -2.39 | 2.57E-36 | 3.27E-34 |
| 207430_s_at  | MSMB            | -2.37 | 1.07E-16 | 1.35E-15 |
| 214981_at    | POSTN           | -2.36 | 1.02E-32 | 8.55E-31 |
| 1563209_a_at | MACROD2         | -2.32 | 1.46E-28 | 7.65E-27 |
| 1552566_at   | BTBD16          | -2.31 | 3.53E-25 | 1.23E-23 |
| 227123_at    | RAB3B           | -2.31 | 7.12E-35 | 7.56E-33 |
| 206811_at    | ADCY8           | -2.29 | 5.47E-15 | 5.59E-14 |
| 213706_at    | GPD1            | -2.28 | 1.10E-20 | 2.23E-19 |
| 1555318_at   | HIF3A           | -2.27 | 8.49E-26 | 3.20E-24 |
| 1558393_at   | KRT7            | -2.26 | 4.90E-17 | 6.42E-16 |
| 214558_at    | GPR12           | -2.25 | 1.63E-18 | 2.55E-17 |
| 1554920_at   | SCEL            | -2.22 | 5.35E-12 | 3.77E-11 |
| 229151_at    | SLC14A1         | -2.20 | 5.04E-20 | 9.40E-19 |
| 234980_at    | TMEM56          | -2.19 | 5.97E-17 | 7.74E-16 |
| 234436_x_at  | OBP2A           | -2.16 | 1.53E-13 | 1.32E-12 |
| 207955_at    | CCL27           | -2.15 | 4.94E-30 | 3.02E-28 |
| 224588_at    | XIST            | -2.14 | 0.000133 | 0.000354 |
| 222049_s_at  | RBP4            | -2.13 | 6.24E-13 | 4.97E-12 |
| 227174_at    | WDR72           | -2.12 | 2.12E-29 | 1.21E-27 |
| 1559296_at   | ADAMTS9-<br>AS2 | -2.11 | 5.01E-20 | 9.37E-19 |

---
