# Supplementary material for: Using Micro- and Macro-Level Network Metrics Unveils Top Communicative Gene Modules in Psoriasis
Source: MDPI journal article supplement (doi:10.3390/genes11080914), 2020-08-10
Supplement: s1 [file s1]

**Table S7.** Top 10 enriched pathways in module 1 in order of combined score by WikiPathways 2019 HUMAN database

| Index | Term                                                                                  | Genes                                                                             | Combined Score |
|-------|---------------------------------------------------------------------------------------|-----------------------------------------------------------------------------------|----------------|
| 1     | Regulation of sister chromatid separation at the metaphase-anaphase transition WP4240 | CDC20;CENPE;PTTG1;BUB1B;BUB1; MAD2L1                                              | 2268.4         |
| 2     | Retinoblastoma Gene in Cancer WP2446                                                  | TOP2A;CCNA2;CDT1;CCNB2;CCNB1; RRM2;ORC1;KIF4A;CHEK1;CDK1;TTK; CDC25A              | 1079.0         |
| 3     | Cell Cycle WP179                                                                      | PLK1;TTK;CDC6;CDC25C;CDC25A;CDC20; CCNA2;CCNB2;CCNB1;ORC1;PTTG1; CHEK1; CDK1;BUB1 | 996.1          |
| 4     | Gastric Cancer Network 1 WP2361                                                       | TOP2A;TPX2;CENPF;ECT2;AURKA;KIF15                                                 | 956.5          |
| 5     | ATM Signaling Pathway WP2516                                                          | CCNB1;CHEK1;CDK1;CDC25C;CDC25A                                                    | 409.4          |
| 6     | Integrated Cancer Pathway WP1971                                                      | BLM;CHEK1;PLK1;CDK1;CDC25A                                                        | 359.3          |
| 7     | DNA Damage Response WP707                                                             | CCNB2;CCNB1;CHEK1;CDK1;CDC25C; CDC25A                                             | 299.0          |
| 8     | miRNA Regulation of DNA Damage Response WP1530                                        | CCNB2;CCNB1;CHEK1;CDK1;CDC25C; CDC25A                                             | 281.3          |
| 9     | DNA IR-damage and cellular response via ATR WP4016                                    | EXO1;CHEK1;PLK1;CDK1;FOXM1; CDC25C                                                | 237.3          |
| 10    | DNA Replication WP466                                                                 | CDT1;ORC1;MCM10;CDC6                                                              | 229.5          |
