# Supplementary material for: Using Micro- and Macro-Level Network Metrics Unveils Top Communicative Gene Modules in Psoriasis
Source: MDPI journal article supplement (doi:10.3390/genes11080914), 2020-08-10
Supplement: s1 [file s1]

**Table S6.** Top 10 enriched pathways in module 1 ranked in order of combined score by KEGG 2019 HUMAN Database

| index | Term                                     | Genes                                                                                                | Combined score |
|-------|------------------------------------------|------------------------------------------------------------------------------------------------------|----------------|
| 1     | Cell Cycle                               | PLK1;BUB1B;TTK;CDC6;CDC25C;CDC25A;<br>CDC20;CCNA2;CCNB2;CCNB1;ORC1;PTTG1;<br>CHEK1; CDK1;BUB1;MAD2L1 | 1307.85        |
| 2     | Progesterone-mediated oocyte maturation  | CCNA2;CCNB2;CCNB1;PLK1;CDK1;CDC25C;<br>BUB1;CDC25A;MAD2L1;AURKA                                      | 586.43         |
| 3     | Oocyte meiosis                           | CDC20;CCNB2;CCNB1;PTTG1;PLK1;CDK1;<br>CDC25C;BUB1;MAD2L1;AURKA                                       | 420.88         |
| 4     | p53 signaling pathway                    | CCNB2;CCNB1;RRM2;CHEK1;CDK1;GTSE1                                                                    | 275.82         |
| 5     | Cellular senescence                      | CCNA2;CCNB2;CCNB1;CHEK1;CDK1;FOXM1;<br>CDC25A                                                        | 122.65         |
| 6     | Human T-cell leukemia virus 1 infection  | CDC20;CCNB2;CCNA2; BUB1;PTTG1; CHEK1;<br>BUB1B; MAD2L1                                               | 74.52          |
| 7     | Human immunodeficiency virus 1 infection | CCNB2;CCNB1; CHEK1; CDC25C;CDK1                                                                      | 33.52          |
|       | Pyrimidine metabolism                    | RRM2;TK1                                                                                             | 30.09          |
| 8     | Mismatch repair                          | EXO1                                                                                                 | 23.86          |
| 9     | FoxO signaling pathway                   | CCNB2;CCNB1;PLK1                                                                                     | 20.85          |
