# Supplementary material for: Using Micro- and Macro-Level Network Metrics Unveils Top Communicative Gene Modules in Psoriasis
Source: MDPI journal article supplement (doi:10.3390/genes11080914), 2020-08-10
Supplement: s1 [file s1]

**Table S14.** 149 primary communicative genes

| Module 1 (cell cycle) |          | Module 2 (immune system) |          |
|-----------------------|----------|--------------------------|----------|
| GeneSymbole           | LogFC    | GeneSymbole              | LogFC    |
| CCNB1                 | 1.751606 | EGF                      | 2.015857 |
| CDC20                 | 1.018947 | H2AFX                    | 1.339597 |
| CDK1                  | 1.782422 | IFNG                     | 3.903068 |
| CCNA2                 | 1.425815 | MAPK14                   | 1.380447 |
| AURKA                 | 1.469726 | SOCS3                    | 1.222717 |
| TPX2                  | 1.218712 | IRF1                     | 1.246018 |
| BIRC5                 | 1.666018 | CAT                      | -1.02214 |
| ASPM                  | 1.459225 | IL1B                     | 1.24602  |
| BUB1B                 | 1.14086  | STAT1                    | 2.268373 |
| PLK1                  | 1.081502 | DDX58                    | 1.732727 |
| MKI67                 | 1.555337 | MCL1                     | 1.374379 |
| KIF4A                 | 1.435557 | NCAM1                    | -1.50577 |
| BUB1                  | 1.347923 | CXCL8                    | 1.938556 |
| CENPF                 | 1.312028 | CDH2                     | -1.19601 |
| CCNB2                 | 1.265481 | UBE2N                    | 1.454899 |
| KIF2C                 | 1.063634 | LYN                      | 1.202117 |
| CENPE                 | 1.727115 | IFIH1                    | 2.025857 |
| TTK                   | 1.547076 | CXCL10                   | 2.492372 |
| EXO1                  | 1.452831 | OASL                     | 3.850159 |
| HMMR                  | 1.439402 | UBE2L6                   | 1.137636 |
| DLGAP5                | 1.314865 | IL17A                    | 2.007943 |
| TOP2A                 | 1.270339 | MUC1                     | -1.87438 |
| KIF11                 | 1.072411 | NEDD4L                   | -1.13571 |
| MAD2L1                | 1.171882 | PIK3R1                   | -1.11169 |
| KIF15                 | 1.106039 | ISG15                    | 2.421688 |
| NUF2                  | 1.048822 | ACTA2                    | -1.07901 |
| RRM2                  | 2.435553 | HERC6                    | 1.267729 |
| NDC80                 | 1.600941 | FGFR1                    | 1.039025 |
| KIF20A                | 1.539143 | PRKCB                    | -1.20835 |
| NCAPG                 | 1.411422 | IRF7                     | 1.608537 |
| KIF23                 | 1.296159 | NOS2                     | 2.907845 |
| CDCA5                 | 1.031743 | PPARG                    | -1.33643 |
| MELK                  | 1.531124 | LEP                      | -1.82199 |
| CEP55                 | 1.342255 | CBL                      | 1.327704 |
| NCAPH                 | 1.23415  | CXCL9                    | 1.938556 |
| NEK2                  | 1.205286 | HMOX1                    | -2.42017 |
| PBK                   | 1.200299 | APOE                     | -1.11821 |
| PRC1                  | 1.112868 | CXCL11                   | 1.527269 |
| CDC6                  | 1.500884 | PDGFRA                   | -1.04914 |
| CDC25C                | 1.138681 | OAS1                     | 2.522087 |
| OIP5                  | 1.048265 | OAS2                     | 2.865296 |
| CDCA2                 | 1.422932 | OAS3                     | 2.350212 |
| <b>DTL</b>            | 1.127632 | IL23A                    | 1.24602  |

|          |          |         |          |
|----------|----------|---------|----------|
| FOXM1    | -1.00236 | PPARA   | -1.00535 |
| CHEK1    | 1.602945 | REN     | 3.407901 |
| MCM10    | 1.532975 | RALA    | 1.081825 |
| TRIP13   | 1.273851 | CALML5  | 1.053977 |
| CDKN3    | 1.425817 | CALML3  | 1.267862 |
| CENPN    | 1.357144 | CFTR    | -1.2463  |
| PTTG1    | 1.235721 | MAPK13  | 1.107849 |
| RAD51AP1 | 1.002493 | DLG2    | 1.029973 |
| KIF18A   | 1.290972 | DLG3    | 1.668509 |
| ASF1B    | 1.259889 | DCN     | 1.216145 |
| SKA3     | 1.113315 | TJP1    | 1.551018 |
| DEPDC1   | 1.834209 | SPTAN1  | -1.36387 |
| KIF14    | 1.52683  | CYP2B6  | -1.15122 |
| ECT2     | -1.62846 | MYH14   | -1.43884 |
| SMC4     | 1.037946 | GNAZ    | 1.054781 |
| SPC25    | 1.542773 | ACACB   | -1.32206 |
| SKA1     | 1.395567 | HSD11B1 | 1.526098 |
| KIF18B   | 1.257541 | RIT1    | 1.168371 |
| CDT1     | 1.287663 | MGP     | -1.0137  |
| CKS2     | 1.166541 | STAT3   | 1.519357 |
| GTSE1    | 1.20401  |         |          |
| SGOL1    | 1.119508 |         |          |
| ERCC6L   | 1.371814 |         |          |
| TROAP    | 1.278355 |         |          |
| ORC1     | 1.074018 |         |          |
| CDC25A   | 1.04232  |         |          |
| CASC5    | 1.269604 |         |          |
| CKAP2L   | 1.097901 |         |          |
| FAM83D   | -1.21593 |         |          |
| KPNA2    | 1.160963 |         |          |
| CENPI    | 1.003546 |         |          |
| HELLS    | 2.781395 |         |          |
| CCNF     | 1.333266 |         |          |
| TK1      | 1.035878 |         |          |
| DEPDC1B  | -1.1314  |         |          |
| STIL     | 1.197017 |         |          |
| PARPBP   | 1.096107 |         |          |
| TICRR    | 1.1655   |         |          |
| BLM      | 1.13553  |         |          |
| KIF2A    | 1.066713 |         |          |
| NDEL1    | 1.06672  |         |          |
| TUBG1    | 1.230465 |         |          |
| TNNC1    | -1.64639 |         |          |

---
