# Supplementary material for: Using Micro- and Macro-Level Network Metrics Unveils Top Communicative Gene Modules in Psoriasis
Source: MDPI journal article supplement (doi:10.3390/genes11080914), 2020-08-10
Supplement: s1 [file s1]

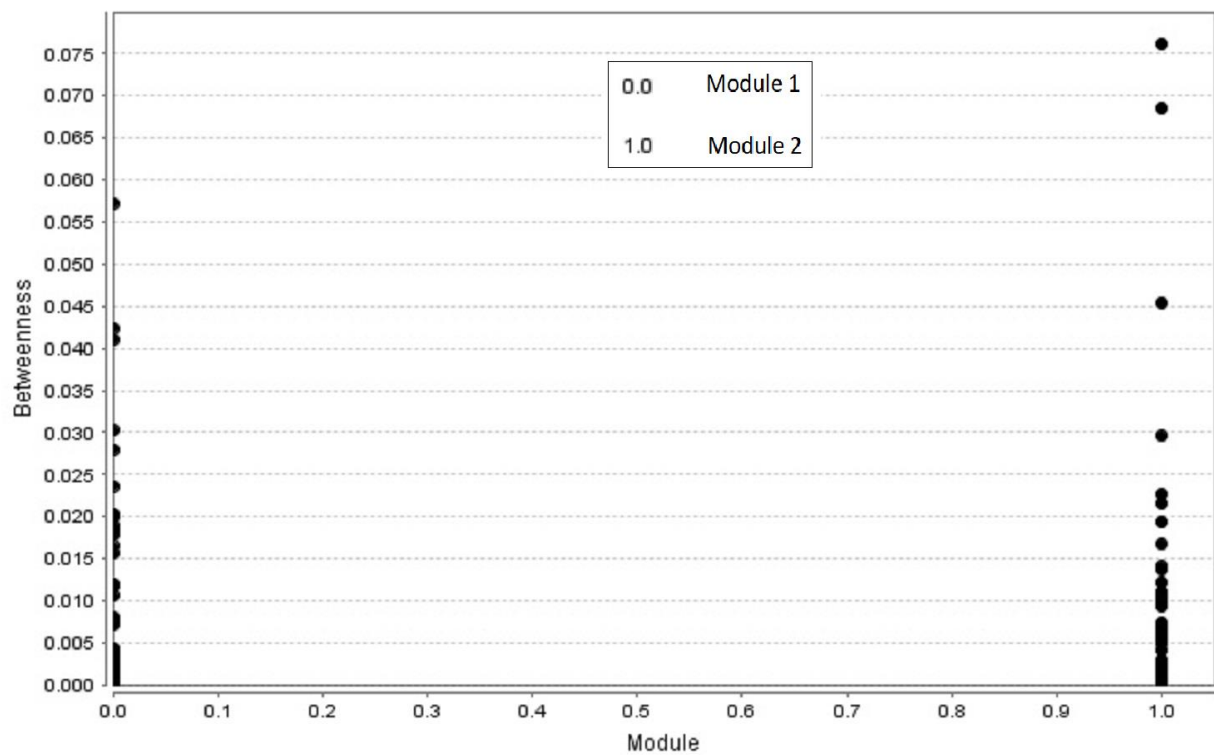

**Figure S6.** Metrics distribution for each module. (a) Betweenness distribution.

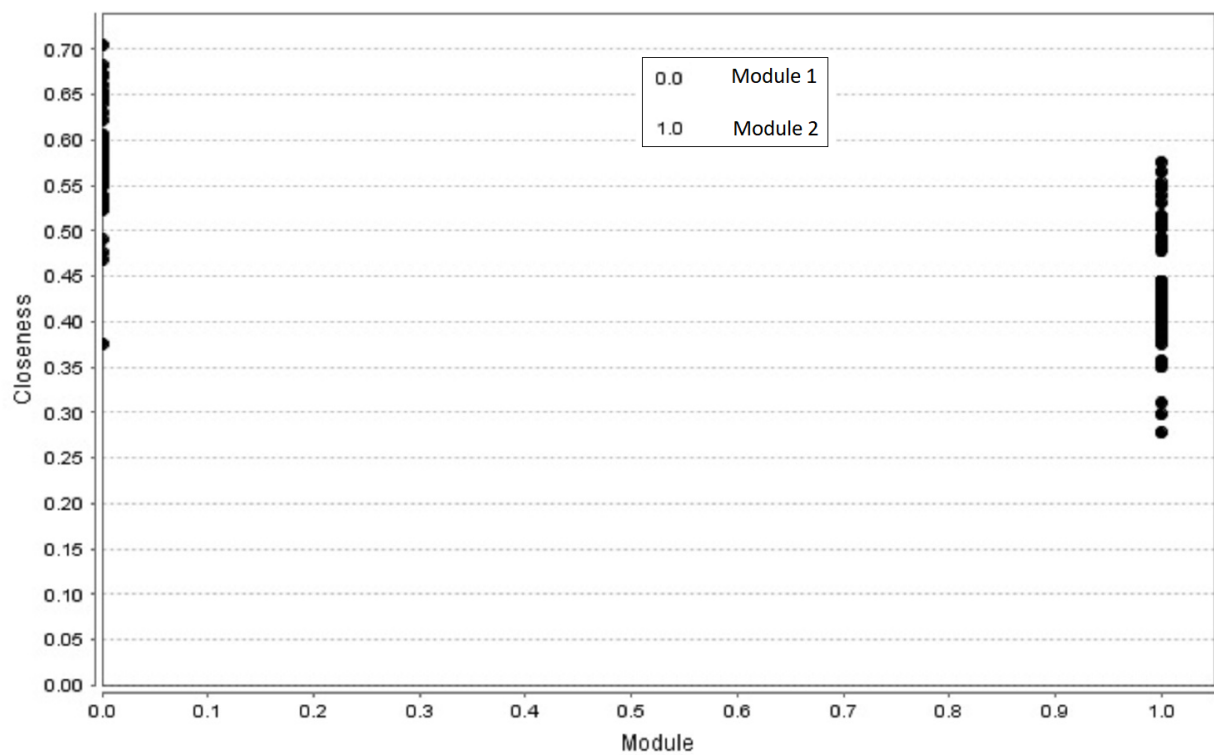

**Figure S6.** Metrics distribution for each module. (b) Closeness distribution.

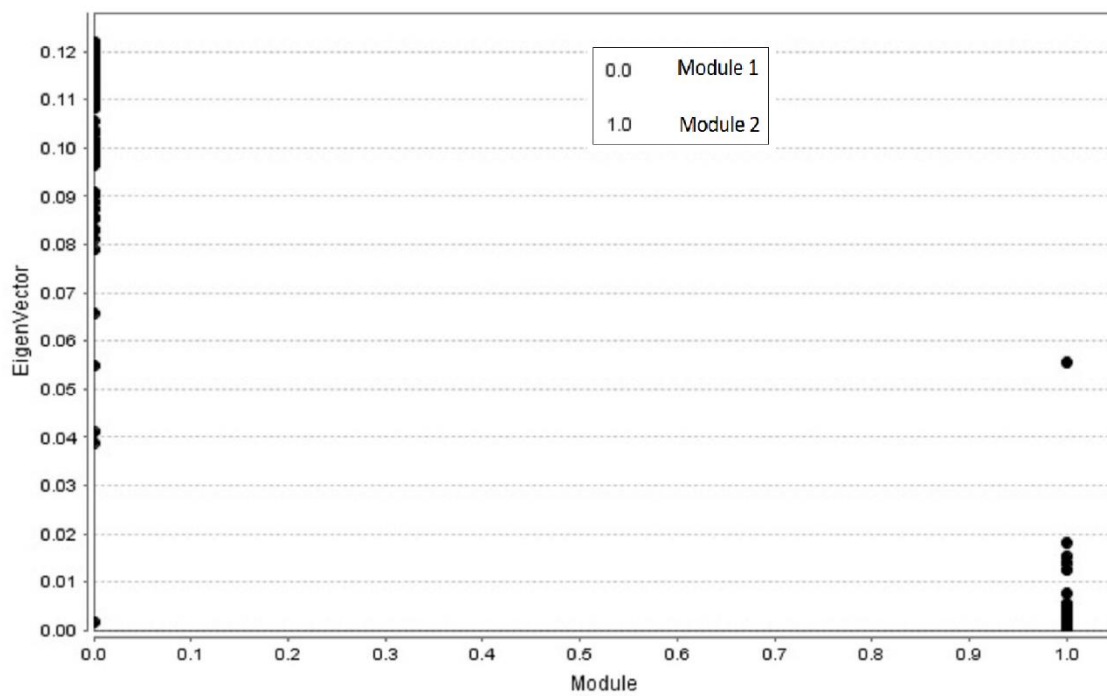

**Figure S6.** Metrics distribution for each module. (c) Eigenvector distribution.

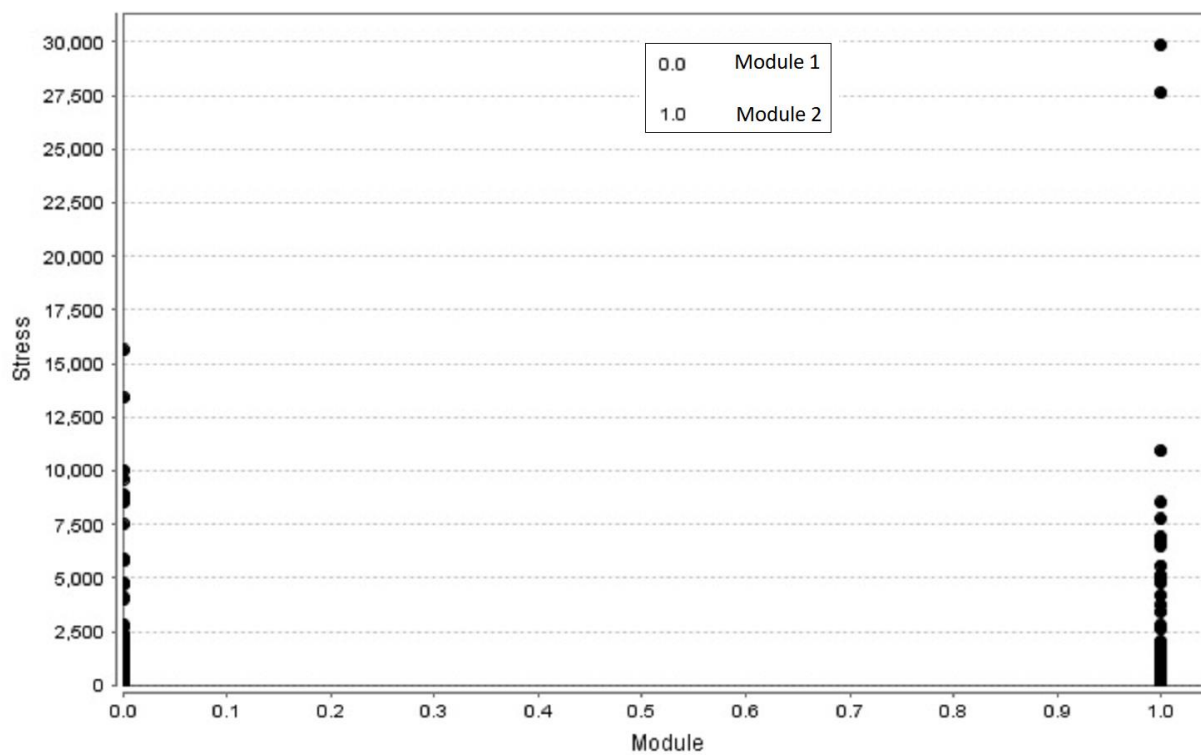

**Figure S6.** Metrics distribution for each module. (d) Stress distribution.

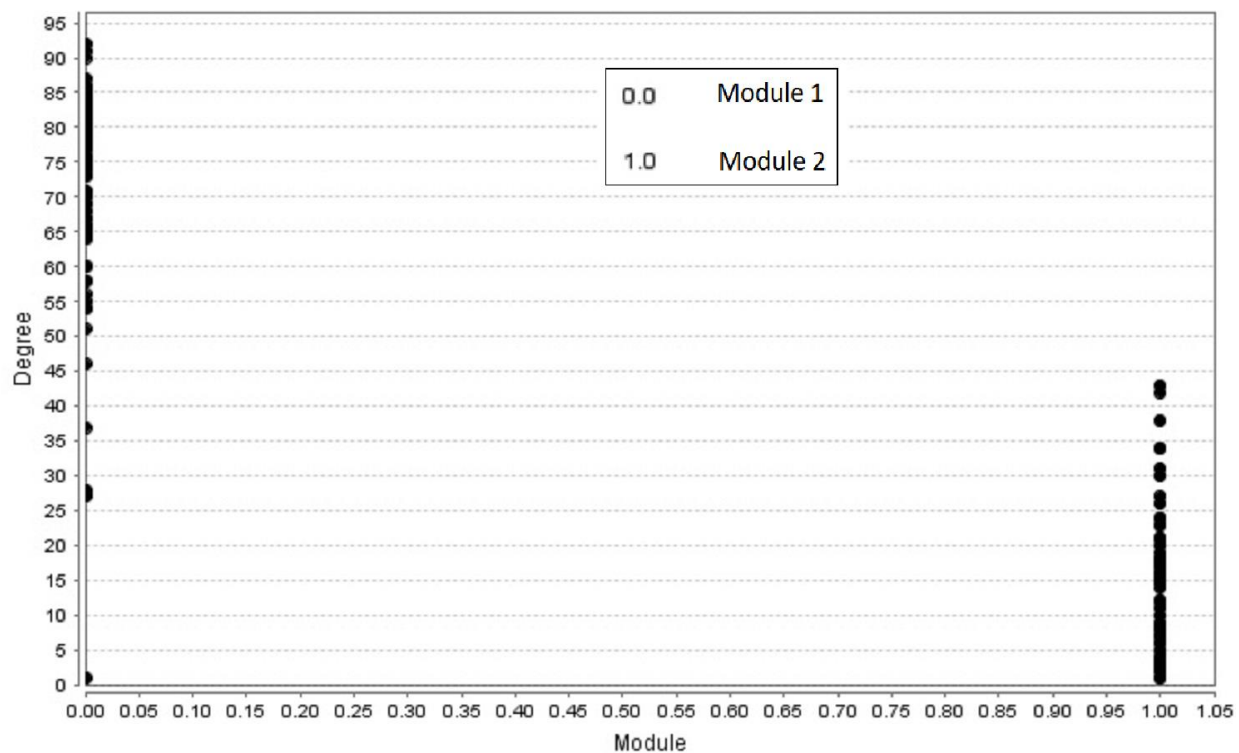

**Figure S6.** Metrics distribution for each module. (e) Degree distribution.
