# Supplementary material for: Using Micro- and Macro-Level Network Metrics Unveils Top Communicative Gene Modules in Psoriasis
Source: MDPI journal article supplement (doi:10.3390/genes11080914), 2020-08-10
Supplement: s1 [file s1]

**Table S4.** The characteristics of analysis on 86-gene module (module 1) based on micro level network metrics.

| <b>Metrics</b>                    | <b>Min</b> | <b>Max</b> | <b>Min (top)</b> | <b>Max (top)</b> | <b>No. of Total</b> | <b>Genes (descending order)</b>         |
|-----------------------------------|------------|------------|------------------|------------------|---------------------|-----------------------------------------|
| <b>Degree</b>                     | 1          | 92         | 87               | 92               | 4                   | CCNB1, CDC20, CDK1, CCNA2               |
| <b>Stress</b>                     | 0          | 15636      | 8732             | 15636            | 6                   | CCNB1, MKI67, CDK1, CCNA2, FOXM1, CDC20 |
| <b>Betweenness</b>                | 0          | 0.05       | 0.03             | 0.05             | 4                   | CCNB1, CDC20, MKI67, CDK1               |
| <b>Shared genes of all groups</b> |            |            |                  |                  | 5                   | CCNA2, CCNB1, MKI67, CDK1, CDC20        |
