# Supplementary material for: Using Micro- and Macro-Level Network Metrics Unveils Top Communicative Gene Modules in Psoriasis
Source: MDPI journal article supplement (doi:10.3390/genes11080914), 2020-08-10
Supplement: s1 [file s1]

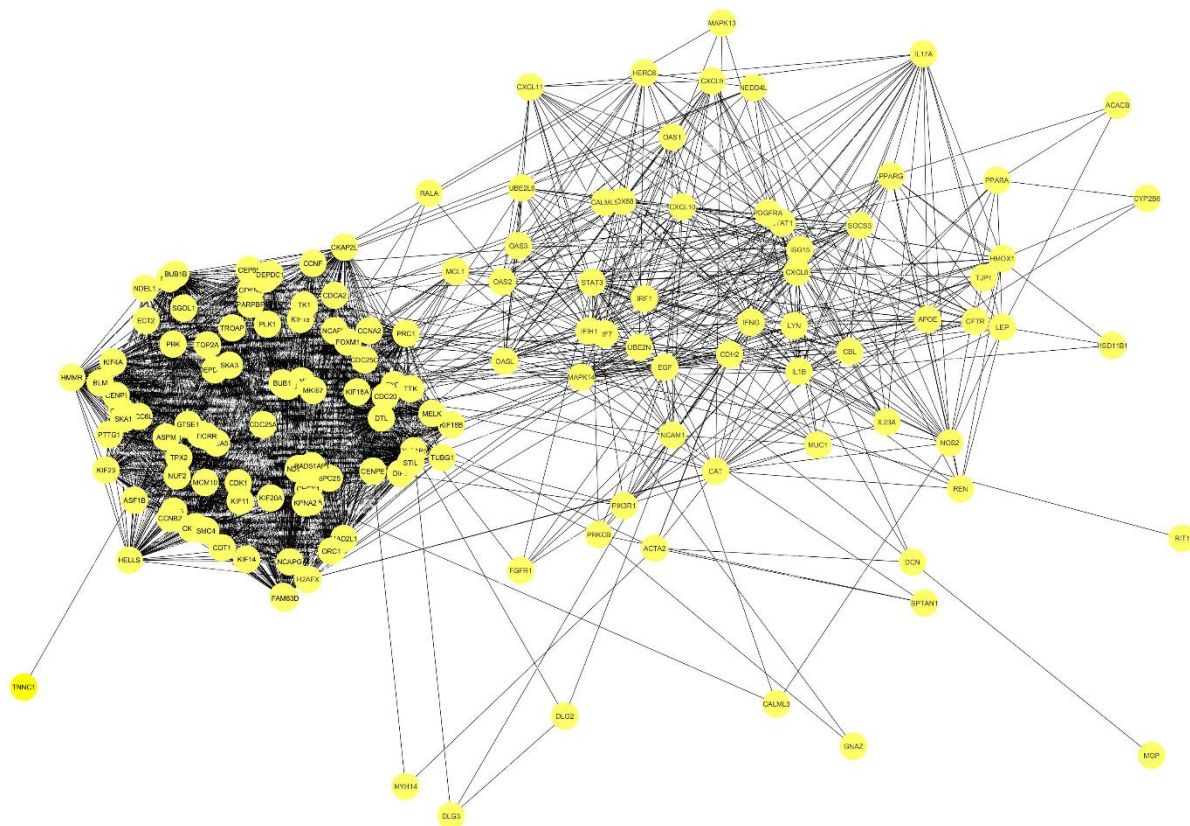

Clustering coefficient : 0.734  
 Connected components : 1  
 Network diameter : 5  
 Network radius : 3  
 Network centralization : 0.300  
 Shortest paths : 22052 (100%)  
 Characteristic path length : 1.985  
 Avg. number of neighbors : 48.225

Number of nodes : 149  
 Network density : 0.0326  
 Network heterogeneity : 0.652  
 Isolated nodes : 0  
 Number of self-loops : 0  
 Multi-edge node pairs : 0  
 Analysis time (sec) : 0.067

**Figure S5.** Primary communicative genes PPI network analyzed by Cytoscape.
