# Supplementary material for: Using Micro- and Macro-Level Network Metrics Unveils Top Communicative Gene Modules in Psoriasis
Source: MDPI journal article supplement (doi:10.3390/genes11080914), 2020-08-10
Supplement: s1 [file s1]

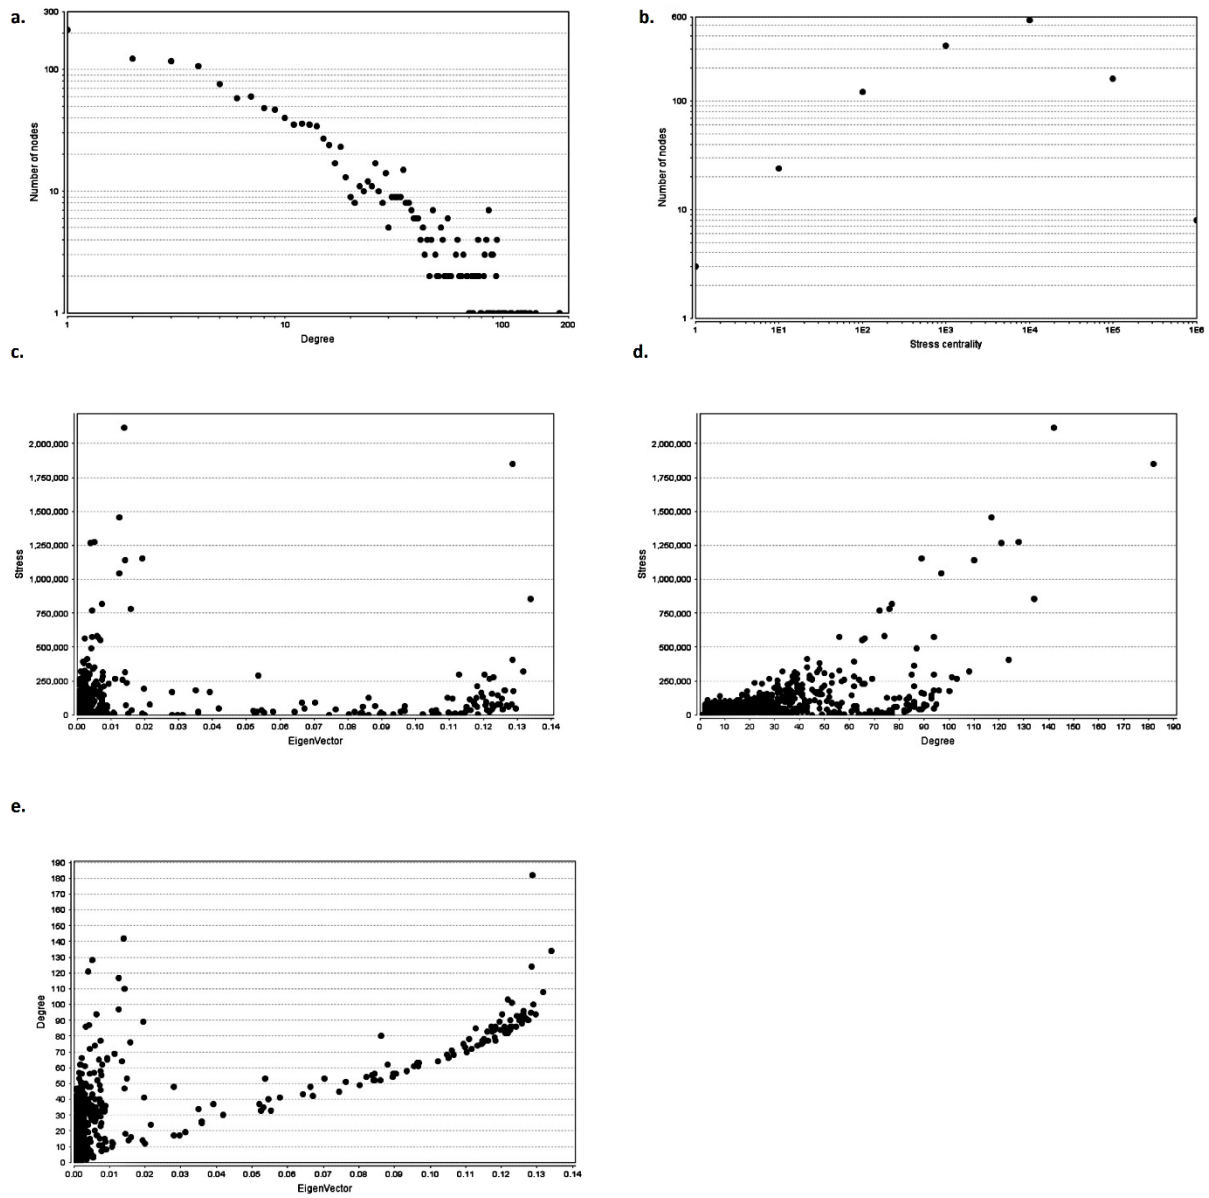

**Figure S4.** The distributions and plots of chosen metrics for 1481-gene PPI network analysis. (a) Degree distribution. (b) Stress distribution. (c) Scatter plot of stress and eigenvector. (d) Scatter plot of stress and degree. (e) Scatter plot of degree and eigenvector.
